# Supplementary material
Source: HighWire-hosted journal article supplement (https://www.rcpjournals.org/highwire/filestream/12487/field_highwire_adjunct_files/0/Senn_supplementary_material_S1.pdf)
Supplement: Senn_supplementary_material_S1.pdf [file Senn_supplementary_material_S1.pdf]

## Exception reporting survey

1. Are you an FY1 or FY2?

Mark only one oval.

FY1

FY2

2. What is your current post?

---

3. In the last 2 months, how many exception reports have you submitted? (Roughly)

---

4. In the last 2 months how many times have you worked past the end of your shift? (Roughly)

---

5. What length of overtime have you/would you exception report?

Tick all that apply.

< 30 minutes

30 minutes

45 minutes

1 hour

1 hour 30 minutes

2 hours +

None

6. How satisfied are you with the exception reporting process? (5 being completely satisfied)

Mark only one oval.

1      2      3      4      5

---

          

---

**7. If you have not exception reported, or not exception reported every time you worked overtime, why was this?**

Tick all that apply.

- I was worried I might be seen as "slow" or not doing my job efficiently
- I don't think it makes any difference
- It takes too long to exception report
- I don't know how to submit an exception report
- I don't know how long is an acceptable length of overtime to exception report
- I felt pressurised not to exception report
- I don't like having to have a meeting with my consultant to discuss it
- I have been told I can't get payment for it
- I haven't yet been paid for any of my reports
- Insufficient senior encouragement
- The rest of my team doesn't exception report
- Other: \_\_\_\_\_

**8. What would make you more likely to exception report?**

---

---

---

---

---

**9. Was the exception reporting in your previous trust better? If so, why?**

---

---

---

---

---

**10. Would you feel more comfortable exception reporting if your consultant has encouraged it?**

Mark only one oval.

- Yes
- No
